# Supplementary material for: DMAP molecule grafting on a carbon nitride heptazine ring for the better degradation of pollutants – the synergy of electron withdrawing and steric hindrance effects
Source: Royal Society of Chemistry journal article supplement (doi:10.1039/d1cy01780b), 2021-01-01
Supplement: d1cy01780b1.pdf [file d1cy01780b1.pdf]

# DMAP molecule grafting carbon nitride heptazine ring for better degradation of pollutants – the synergy of electron withdrawing effect and steric hindrance effect

Shaoteng Yuan, Minghui Zhang, Xuefang Lan\*, Jinsheng Shi \*

Qingdao Agricultural University, Department of Chemistry and Pharmacy, China

\*Corresponding author at: Qingdao Agricultural University, Department of Chemistry and Pharmacy, Chengyang District, Qingdao, China

E-mail address: jsshinqn@aliyun.com

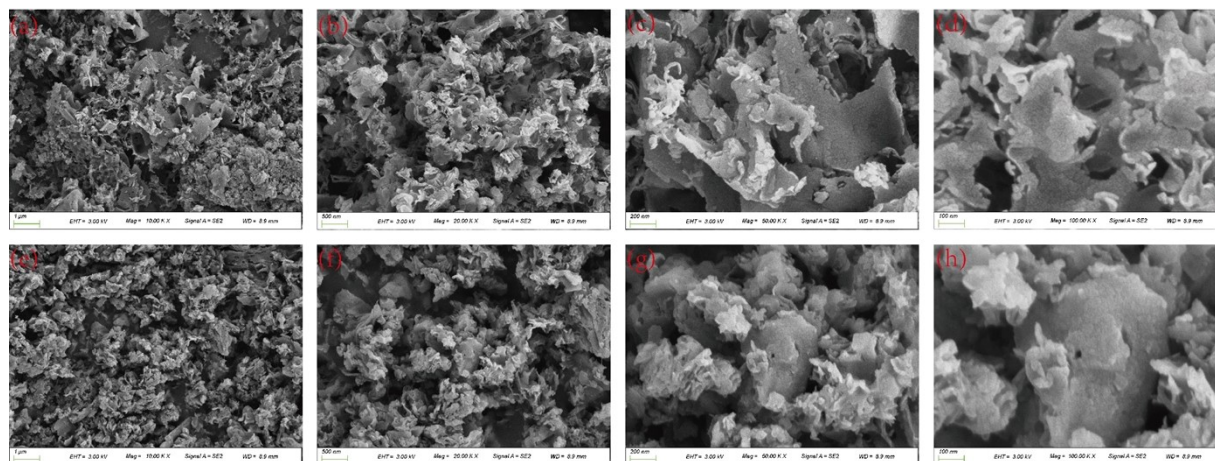

Fig. S1. SEM images of (a, b, c, d) CN@DMAP-100 and (e, f, g, h) CN@DMAP-500 samples.

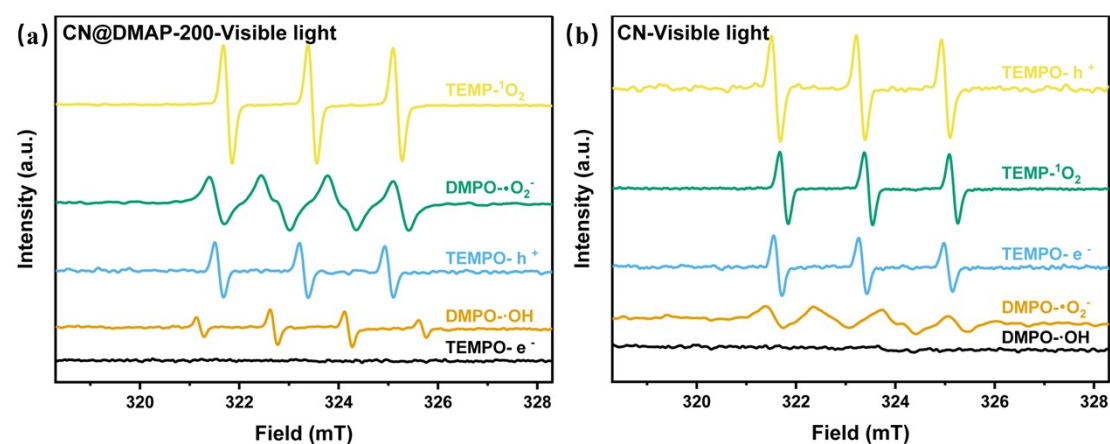

Fig. S2. The ESR responses of different active species under visible light irradiation (10 min) of CN@DMAP-200 (a) and CN (b).
